# Supplementary material for: Ab initio insight into the electrolysis of water on basal and edge (fullerene C20) surfaces of 4 Å single-walled carbon nanotubes
Source: Royal Society of Chemistry journal article supplement (doi:10.1039/d2ra06123f), 2022-01-01
Supplement: d2ra06123f1.pdf [file d2ra06123f1.pdf]

Supplementary Material for:  
"Water Oxidizes The Surface of Ultrasmall 4 Å Single-walled Carbon Nanotubes and fullerene C20"

Zhen Jiang

*Department of Chemistry, University of Pennsylvania, Philadelphia, PA, 19104-6323 USA\**

Nadia N. Intan

*Department of Chemical and Biomolecular Engineering,  
University of Nebraska-Lincoln, Lincoln, NE 68588, USA*

Qiong Yang

*Hunan Provincial Key Laboratory of Thin Film Materials and Devices,  
School of Materials Science and Engineering, Xiangtan University, Xiangtan, Hunan 411105, China*

(Dated: September 15, 2022)

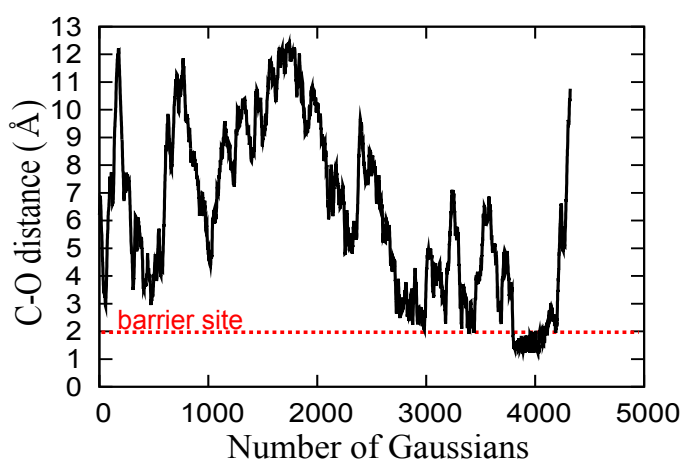

FIG. S1. Evolution of the coordination number ( $\xi$ ) with respect to the number of Gaussian functions ( $N_G$ ) for  $V^{3+}(\text{aq})$ .

### I. METADYNAMIC SIMULATIONS

Figure S1 shows the evolution of bond distance between the oxygen atom of water molecule and one of the C atoms on the surface of 4 Å SWCNT tube (5,0), as a function of the number of Gaussians  $N_G$  used to reconstruct the free energy profile for the water first dissociation reaction on the surface of tube (5,0) in Figure 3 (a). In this Figure S1, the selected  $H_2O$  was diffusing in the aqueous solution with the collective variable ranging from 12.6 to 2.0 Å. The activation energy barrier is picked when the bond distance = 2.0 Å which corresponds to when the number of Gaussians = 3780. The water dissociation reaction is complete after addition of 4200 number of Gaussians. The reconstruction of free energy profile in Figure 3(a) is based on the results at 4200 Gaussians.

---

\* zjiang16@sas.upenn.edu
